# Supplementary material
Source: PubMed Central journal article supplement (PMC8727237)
Supplement: 520_2021_6788_MOESM3_ESM.pdf [file 520_2021_6788_MOESM3_ESM.pdf]

**Health Concerns in Adult Survivors of Childhood Cancer during COVID pandemic: Survey of Sibling of Cancer Survivors**

**Section 1: Basic Data**

1. Your Name:
2. Your age:
3. Hospital number of your brother/sister:
4. ACT Clinic ID of your brother/sister:
5. Phone number:

**Section 2: General Health**

1. Before March 2020, have you had any long-term illness?
  - Yes
  - No
  - Not sure
2. Are you taking any medicine which needs to be taken every day?
  - Yes
  - No
  - Not sure
3. If yes to either of the above questions, please provide details of your previous illness and medicines being taken
4. During the past 6 months (after March 2020) have you had any health problems? This can include physical or psychological/ mental health problems
  - Yes
  - No

If answer is yes, go to section 3

If the answer is no, got to section 4

**Section 3: Health problems since March 2020**

This can include physical as well as psychological problems. These details will be kept confidential and not disclosed to anyone

1. During the past 6 months have you had any health concerns? Yes/No
  - a. If yes, how many times?

- b. What were the specific complaints?
- Fever
  - Bodyache
  - Headache
  - Other pain:
  - Cough
  - Breathing difficulty
  - Sore throat
  - Weight loss :
  - Weight gain :
  - Menstrual irregularities:
  - Excessive tiredness/lack of energy:
  - Problems with sleep:
  - Irritability/ anger issues
  - Lack of concentration
  - Anxiety:
  - Depression:
  - Suicidal ideas:
  - Fear of getting infected with Coronavirus
  - Others:
  - Details:
2. In the past 6 months (since March 2020), have you met or spoken to any doctors or other healthcare professionals?
- Physician
  - Psychologist/ Psychiatrist
  - Physical or occupational therapist
  - Others
3. Are you currently on any medication (prescribed within the past 6 months)
- Yes
  - No
  - Details, if yes
4. Have you been admitted in hospital during the past 6 months?
- Yes
  - No
  - Details, if yes

5. Have you had a medical problem during the past 6 months, but could not come to TMH or show any local doctors?
- Yes
  - No
  - Details, if yes

#### **Section 4. COVID –related**

6. Have you been diagnosed with COVID?
- Yes
  - No
7. Have you had symptoms suggestive of COVID infection, which was not diagnosed?
- Yes
  - No
8. Has anyone in your family/friend circle been diagnosed with COVID?
- Yes
  - No
9. Are you satisfied with your knowledge about COVID?
- Yes
  - No
10. feel that you are taking adequate precautions against COVID?
- Yes
  - No
11. Do you have any concerns about COVID, having a cancer survivor in your family?
- Yes
  - No

#### **Section 5. Satisfaction Survey**

12. How satisfied are you with your health?
- Very dissatisfied
  - Dissatisfied
  - Neither satisfied nor dissatisfied
  - Satisfied
  - Very satisfied
13. How satisfied are you with your access to health services?

- Very dissatisfied
- Dissatisfied
- Neither satisfied nor dissatisfied
- Satisfied
- Very satisfied

**Section 6. Social and Family Life:**

14. Are you staying alone or with family?

15. How satisfied are you with the conditions of your living place?

- Very dissatisfied
- Dissatisfied
- Neither satisfied nor dissatisfied
- Satisfied
- Very satisfied

16. How satisfied are you with your personal relationships?

- Very dissatisfied
- Dissatisfied
- Neither satisfied nor dissatisfied
- Satisfied
- Very satisfied

17. How will you best describe your relationship status?

- Single
- Married
- Divorced/separated
- Widowed
- in a stable relationship
- Others

18. Do you have children?

- Yes
- No

19. Is there anyone with health issues in family(spouse/children/parents/sibling)—this can include physical and psychological health?

- Yes
- No

20. Are you currently studying?

- Yes
  - No
  - Dropped out after COVID
  - Attending online classes/tuition
  - Finished education
21. What is your highest qualification?
- High school
  - SSC (10th standard)
  - HSC (+2 or 12th grade)
  - Graduation
  - Post-graduaton
  - Other:
22. Are you working?
- Yes
  - No
  - Looking for job
23. If you are working or were working earlier, have there been any changes to your job after March 2020?
- No
  - Work from home
  - Partial attendance at work
  - Lost job
  - Changed job
24. Has the financial situation in your family become worse after March 2020?
- Yes
  - No
25. Has anyone in your family lost their job or dropped out of education?
- Yes
  - No
26. Do you have health insurance?
- Yes
  - No
27. How much has your social life changed in the past 6 months?
- Very much
  - Slightly

- Not at all
  - Improved
28. Are you able to get as much exercise as you would like?
- Yes
  - No
29. Is your diet as healthy as you would like?
- Yes
  - No
30. How has this COVID pandemic affected you?
- Very much
  - Slightly
  - Not at all
  - Will improve my life
31. How have you managed to cope with the stress of the past 6 months?
- Nothing special
  - Prayer/meditation
  - New hobbies
  - Being with friends and family
  - Not able to cope with stress
32. Are you concerned about the health of your brother/sister, currently or in the future?
- Very much
  - Slightly
  - Not at all
  - This scenario will improve their life
33. Would you like to talk to us? Yes/No
- Details (telephone number/email address)
